# Supplementary material for: Predictive Analysis of Linoleic Acid in Red Meat Employing Advanced Ensemble Models of Bayesian and CNN-Bi-LSTM Decision Layer Fusion Based Hyperspectral Imaging
Source: MDPI journal article supplement (doi:10.3390/foods13030424), 2024-01-28
Supplement: s1 [file s1]

## Supplementary material

**Table S1.** Statistical results of characteristic wavelength extraction.

| Method | Partition method | Number | Calibration set |       |       | Prediction set  |       |       |
|--------|------------------|--------|-----------------|-------|-------|-----------------|-------|-------|
|        |                  |        | Rc <sup>2</sup> | RMSE  | SE    | Rp <sup>2</sup> | RMSE  | SE    |
| PLSR   | UVE              | 20     | 0.686           | 0.104 | 0.105 | 0.750           | 0.114 | 0.114 |
|        | VCPA             | 11     | 0.794           | 0.085 | 0.085 | 0.840           | 0.092 | 0.093 |
|        | CARS             | 17     | 0.792           | 0.085 | 0.086 | 0.820           | 0.094 | 0.095 |
|        | iVISSA           | 45     | 0.837           | 0.076 | 0.076 | 0.840           | 0.089 | 0.090 |
|        | IRIV             | 52     | 0.830           | 0.078 | 0.078 | 0.849           | 0.087 | 0.088 |

**Table S2.** Bayes-CNN-Bi-LSTM model training parameters.

| Hyperparameter name |                        | Model             |
|---------------------|------------------------|-------------------|
|                     |                        | Bayes-CNN-Bi-LSTM |
| CNN                 | L2 Regularization      | 0.001             |
|                     | Kernel                 | 1x3               |
|                     | Dropout Layer          | 0.1               |
|                     | Learn Rate Drop Factor | 0.6               |
| Bayes               | Num Of Units           | 128               |
|                     | Hidden layer           | 32                |
|                     | Initial Learn Rate     | 0.05              |

**Table S3.** LSTM model training parameters.

| Hyperparameter name    | Model |         |             |                   |
|------------------------|-------|---------|-------------|-------------------|
|                        | LSTM  | Bi-LSTM | CNN-Bi-LSTM | bayes-CNN-Bi-LSTM |
| Units                  | 128   | 128     | 128         | 128               |
| Mini BatchSize         | 16    | 16      | 32          | 32                |
| Max Epochs             | 500   | 500     | 500         | 500               |
| Learningrate           | 0.001 | 0.0009  | 0.01        | 0.01              |
| Learn Rate Drop Period | 100   | 100     | 50          | 50                |
| L2 Regularization      | 0.001 | 0.001   | 0.0015      | 0.0015            |
